# Supplementary material
Source: PubMed Central journal article supplement (PMC7418463)
Supplement: NIHMS1609511-supplement-Supplementary_Information.pdf [file NIHMS1609511-supplement-Supplementary_Information.pdf]

In the format provided by the authors and unedited.

# Clinical-grade computational pathology using weakly supervised deep learning on whole slide images

Gabriele Campanella<sup>1,2</sup>, Matthew G. Hanna<sup>1</sup>, Luke Geneslaw<sup>1</sup>, Allen Miraflor<sup>1</sup>, Vitor Werneck Krauss Silva<sup>1</sup>, Klaus J. Busam<sup>1</sup>, Edi Brogi<sup>1</sup>, Victor E. Reuter<sup>1</sup>, David S. Klimstra<sup>1</sup> and Thomas J. Fuchs<sup>1,2\*</sup> 

---

<sup>1</sup>Department of Pathology, Memorial Sloan Kettering Cancer Center, New York, NY, USA. <sup>2</sup>Weill Cornell Graduate School of Medical Sciences, New York, NY, USA. \*e-mail: [fuchst@mskcc.org](mailto:fuchst@mskcc.org)

| Source              | Split               | Metric              | Total Slides | FNR    | TPR    | FPR    | TNR    |
|---------------------|---------------------|---------------------|--------------|--------|--------|--------|--------|
| In-house            | Train               | Cancer              | 1,712        | 0.0058 | 0.9942 | -      | -      |
|                     |                     | Grade 6             | 870          | 0.0092 | 0.9908 | -      | -      |
|                     |                     | Grade 7             | 662          | 0.0030 | 0.9970 | -      | -      |
|                     |                     | Grade 8             | 95           | 0.0000 | 1.0000 | -      | -      |
|                     |                     | Grade 9             | 83           | 0.0000 | 1.0000 | -      | -      |
|                     |                     | Grade 10            | 0            | -      | -      | -      | -      |
|                     |                     | Tumor Size: 0.1-1.2 | 401          | 0.0175 | 0.9825 | -      | -      |
|                     |                     | Tumor Size: 1.2-3.3 | 425          | 0.0047 | 0.9953 | -      | -      |
|                     |                     | Tumor Size: 3.3-6.5 | 434          | 0.0023 | 0.9977 | -      | -      |
|                     |                     | Tumor Size: 6.5-70  | 428          | 0.0000 | 1.0000 | -      | -      |
|                     | Validation          | Benign              | 6,809        | -      | -      | 0.0117 | 0.9883 |
|                     |                     | Atrophy/Hyperplasia | 88           | -      | -      | 0.0114 | 0.9886 |
|                     |                     | Cancer              | 345          | 0.0087 | 0.9913 | -      | -      |
|                     |                     | Grade 6             | 202          | 0.0099 | 0.9901 | -      | -      |
|                     |                     | Grade 7             | 114          | 0.0088 | 0.9912 | -      | -      |
|                     |                     | Grade 8             | 17           | 0.0000 | 1.0000 | -      | -      |
|                     |                     | Grade 9             | 12           | 0.0000 | 1.0000 | -      | -      |
|                     |                     | Grade 10            | 0            | -      | -      | -      | -      |
|                     |                     | Tumor size: 0.1-1.2 | 97           | 0.0309 | 0.9691 | -      | -      |
|                     |                     | Tumor size: 1.2-3.3 | 75           | 0.0000 | 1.0000 | -      | -      |
|                     |                     | Tumor size: 3.3-6.5 | 83           | 0.0000 | 1.0000 | -      | -      |
|                     |                     | Tumor size: 6.5-70  | 88           | 0.0000 | 1.0000 | -      | -      |
|                     |                     | Test                | Benign       | 1,482  | -      | -      | 0.0533 |
|                     | Atrophy/Hyperplasia |                     | 28           | -      | -      | 0.0357 | 0.9643 |
|                     | Cancer              |                     | 345          | 0.0174 | 0.9826 | -      | -      |
|                     | Grade 6             |                     | 169          | 0.0178 | 0.9822 | -      | -      |
|                     | Grade 7             |                     | 145          | 0.0138 | 0.9862 | -      | -      |
|                     | Grade 8             |                     | 19           | 0.0526 | 0.9474 | -      | -      |
|                     | Grade 9             |                     | 12           | 0.0000 | 1.0000 | -      | -      |
|                     | Grade 10            |                     | 0            | -      | -      | -      | -      |
|                     | Tumor size: 0.1-1.2 |                     | 83           | 0.0723 | 0.9277 | -      | -      |
|                     | Tumor size: 1.2-3.3 |                     | 92           | 0.0000 | 1.0000 | -      | -      |
|                     | External            | Tumor size: 3.3-6.5 | 79           | 0.0000 | 1.0000 | -      | -      |
| Tumor size: 6.5-70  |                     | 87                  | 0.0000       | 1.0000 | -      | -      |        |
| Benign              |                     | 1,439               | -            | -      | 0.0500 | 0.9500 |        |
| Atrophy/Hyperplasia |                     | 31                  | -            | -      | 0.0000 | 1.0000 |        |
| Cancer              |                     | 12,413              | 0.0411       | 0.9589 | -      | -      |        |
| Grade 6             |                     | 3,432               | 0.0280       | 0.9720 | -      | -      |        |
| Grade 7             |                     | 6,085               | 0.0251       | 0.9749 | -      | -      |        |
| Grade 8             |                     | 1,333               | 0.0765       | 0.9235 | -      | -      |        |
| Grade 9             |                     | 1,445               | 0.0381       | 0.9619 | -      | -      |        |
| Grade 10            |                     | 18                  | 0.2222       | 0.7778 | -      | -      |        |
| Tumor size: 0.1-1.2 |                     | 3,345               | 0.0984       | 0.9016 | -      | -      |        |
| Tumor size: 1.2-3.3 |                     | 3,103               | 0.0248       | 0.9752 | -      | -      |        |
| Tumor size: 3.3-6.5 |                     | 2,939               | 0.0160       | 0.9840 | -      | -      |        |
| Tumor size: 6.5-70  | 2,992               | 0.0177              | 0.9823       | -      | -      |        |        |
| Benign              | 314                 | -                   | -            | 0.1433 | 0.8567 |        |        |

Supplementary Table 1: **Stratified prediction performance of the prostate cancer MIL-RNN model.** Abbreviations: FNR=false negative rate; TPR=true positive rate; FPR=false positive rate; TNR=true negative rate. Relevant categories for positive slides are Gleason grades and tumor sizes and for negative slides they are the presence of atrophy or hyperplasia. The dataset was divided into in-house and external consultation cases. The in-house data was sub-divided into training, validation and test sets.
